# Supplementary material for: Structured Populations of Critically Endangered Yellow Water Lily (Nuphar shimadai Hayata, Nymphaeaceae)
Source: MDPI journal article supplement (doi:10.3390/plants11182433), 2022-09-19

Table S1. The multilocus genotype (MLG) diversity of nipa populations in Indo-West Pacific<sup>z</sup>.

| <b>Pop</b> | <b>N</b> | <b>MLG</b> | <b>eMLG</b> | <b>SE</b> | <b>H</b> | <b>G</b> | <b>lambda</b> | <b>E.5</b> | <b>Hexp</b> | <b>Ia</b> | <b>p.Ia</b> | <b>rbarD</b> | <b>p.rD</b> |
|------------|----------|------------|-------------|-----------|----------|----------|---------------|------------|-------------|-----------|-------------|--------------|-------------|
| WP         | 22       | 22         | 11          | 4.45e-07  | 3.09     | 22       | 0.955         | 1          | 0.413       | 3.529     | 0.000999    | 0.11199      | 0.000999    |
| GPb        | 13       | 13         | 11          | 0.00e+00  | 2.56     | 13       | 0.923         | 1          | 0.276       | 0.961     | 0.001998    | 0.04771      | 0.001998    |
| GPa        | 11       | 11         | 11          | 0.00e+00  | 2.40     | 11       | 0.909         | 1          | 0.284       | 0.166     | 0.269730    | 0.00712      | 0.269730    |
| GPn        | 16       | 16         | 11          | 0.00e+00  | 2.77     | 16       | 0.938         | 1          | 0.395       | 0.944     | 0.000999    | 0.02730      | 0.000999    |
| Total      | 62       | 62         | 11          | 0.00e+00  | 4.13     | 62       | 0.984         | 1          | 0.416       | 1.646     | 0.000999    | 0.04518      | 0.000999    |

<sup>z</sup>Pop = population

N = census population size

MLG = number of unique multilocus genotype (MLG) observed

eMLG = number of expected MLG based on rarefaction at smallest  $N \geq 10$

SE = standard error of rarefaction analysis

H = Shannon-Wiener Index of MLG diversity

G = Stoddart and Taylor's Index of MLG diversity

lambda = Simpson's Index

E.5 = Evenness

Hexp = Nei's (1978) expected heterozygosity

Ia = Index of association

p.Ia = p-value for Ia

rbarD = standardized index of association

p,rD = p-value for rbarD

Table S2. Statistical analysis results of Mantel correlogram.

| <b>Distance<br/>class (W)</b> | <b>Class index</b> | <b>Number of<br/>distances</b> | <b>Mantel<br/>correlation</b> | <b><i>p</i> values<br/>(Mantel)</b> | <b><i>p</i> values<br/>(corrected)</b> |
|-------------------------------|--------------------|--------------------------------|-------------------------------|-------------------------------------|----------------------------------------|
| 1                             | 41.451486          | 1254                           | 0.444921                      | 0.0010                              | 0.0010***                              |
| 2                             | 124.354458         | 0                              | NA                            | NA                                  | NA                                     |
| 3                             | 207.257430         | 0                              | NA                            | NA                                  | NA                                     |
| 4                             | 290.160402         | 0                              | NA                            | NA                                  | NA                                     |
| 5                             | 373.063374         | 0                              | NA                            | NA                                  | NA                                     |
| 6                             | 455.966346         | 1056                           | -0.300587                     | 0.0010                              | NA                                     |
| 7                             | 538.869318         | 416                            | 0.059146                      | 0.2139                              | NA                                     |
| 8                             | 621.772291         | 0                              | NA                            | NA                                  | NA                                     |
| 9                             | 704.675263         | 0                              | NA                            | NA                                  | NA                                     |
| 10                            | 787.578235         | 0                              | NA                            | NA                                  | NA                                     |
| 11                            | 870.481207         | 0                              | NA                            | NA                                  | NA                                     |
| 12                            | 953.384179         | 1056                           | -0.207566                     | 0.0010                              | NA                                     |

Significance codes: \*\*\* 0.001

Table S3. The list of first-generation (F<sub>0</sub>) immigrants detected among *N. shimadai* populations in the northern Taiwan based on multilocus genotypes<sup>a</sup>.

| Sample | Home<br>population | -log (L <sub>home</sub> /L <sub>max</sub> ) | Probability | -log(L) | Reference<br>population |
|--------|--------------------|---------------------------------------------|-------------|---------|-------------------------|
| ns39   | GPb                | 2.802                                       | 0.0006      | 11.759  | GPa                     |
| ns41   | GPa                | 1.498                                       | 0.0077      | 15.412  | GPb                     |
| ns50   | GPa                | 1.307                                       | 0.0037      | 22.204  | GPb                     |

<sup>a</sup> log(L<sub>home</sub>/L<sub>max</sub>) (likelihood ratio); probability, significant at p<0.01; -log(L) (genetic distance); reference population (population of origin) with population codes found in Table 5.

Table S4. Number of migrants ( $Nm$ ) using private alleles.

| Sample size                                        | $Nm$     |
|----------------------------------------------------|----------|
| Mean N = 10                                        | 0.451128 |
| Mean N = 25                                        | 0.269447 |
| Mean N = 50                                        | 0.199791 |
| Corrected value for sample size                    | 0.291291 |
| Mean sample size: 15.4872                          |          |
| Mean frequency of private alleles, p (1): 0.165214 |          |

Figure S1. PCR amplicons of the selected 10 primers  
ACC-111

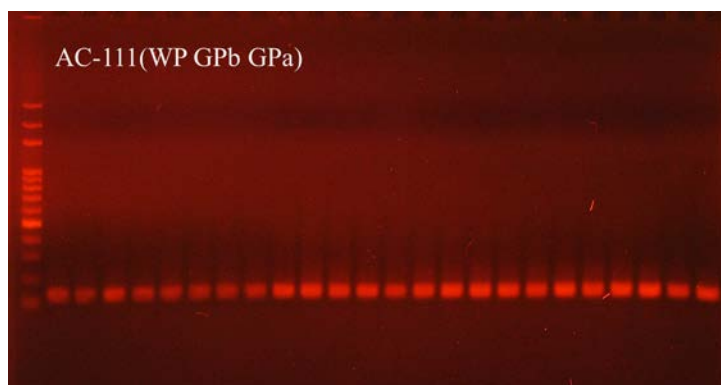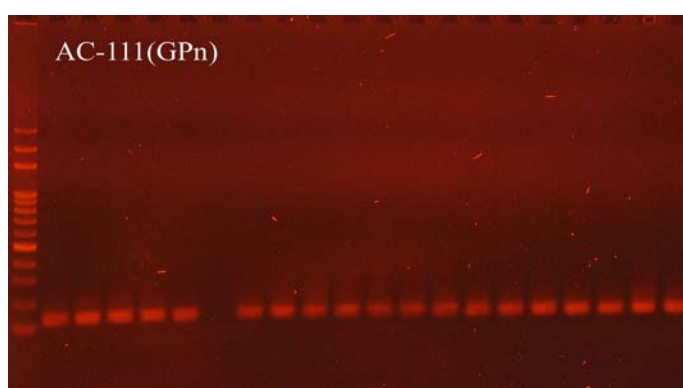

AC165

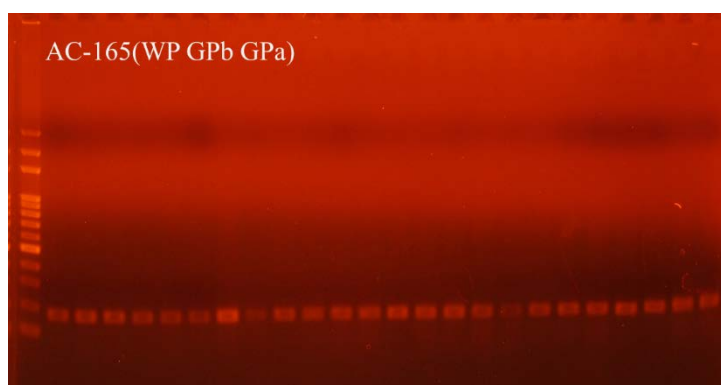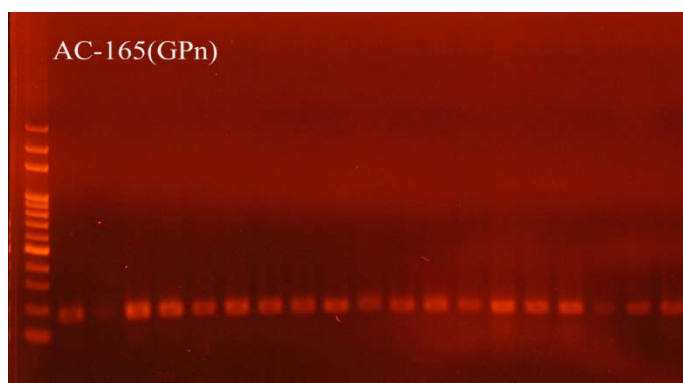

## AC-176

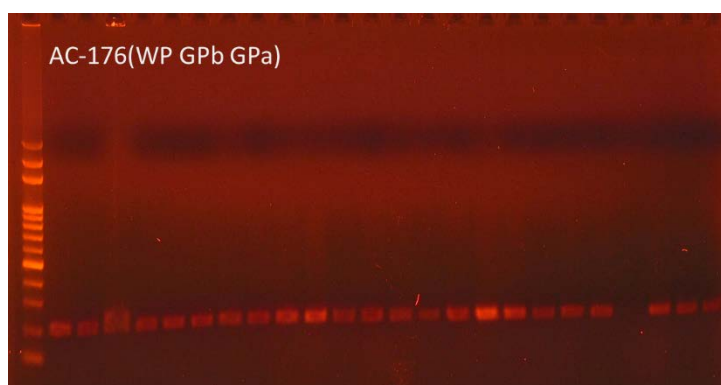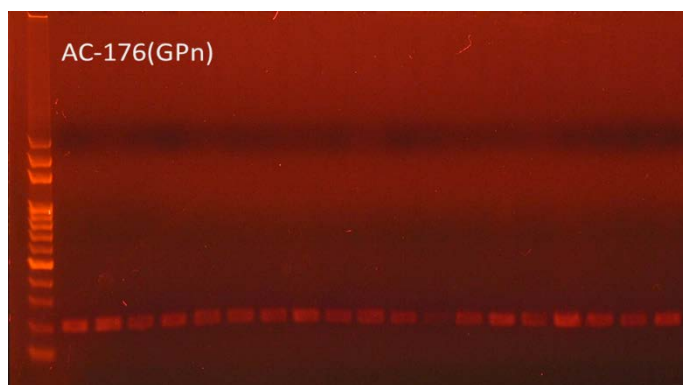

## AC-178

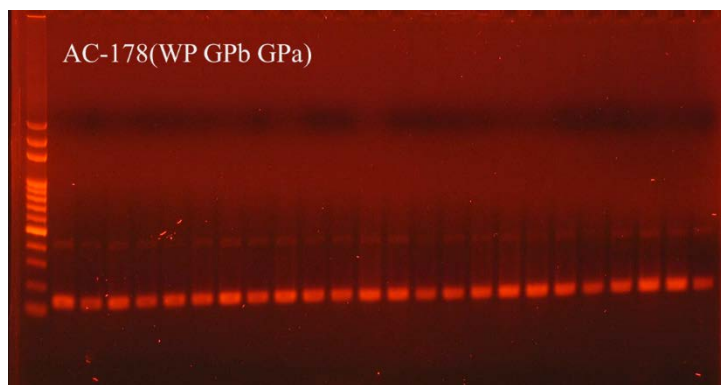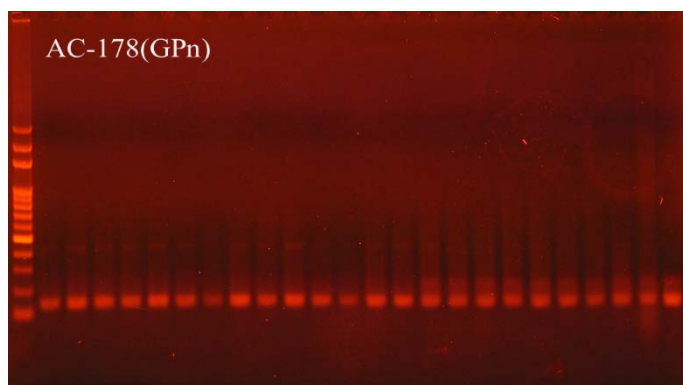

## AC-182a

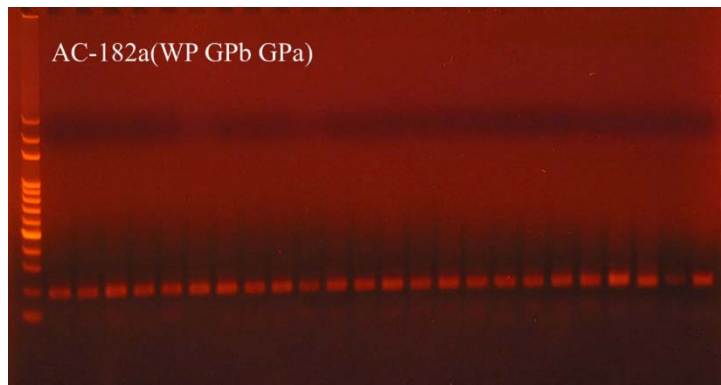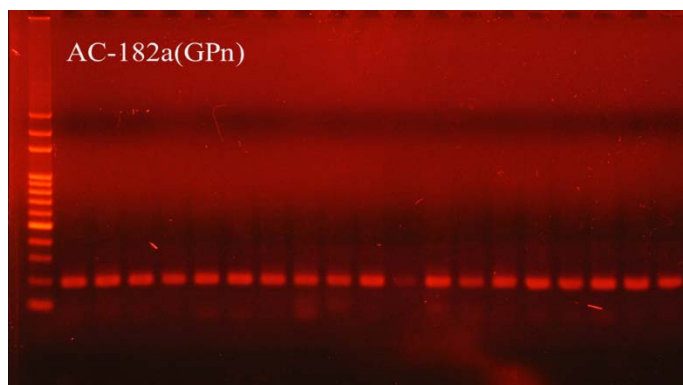

## AC-182b

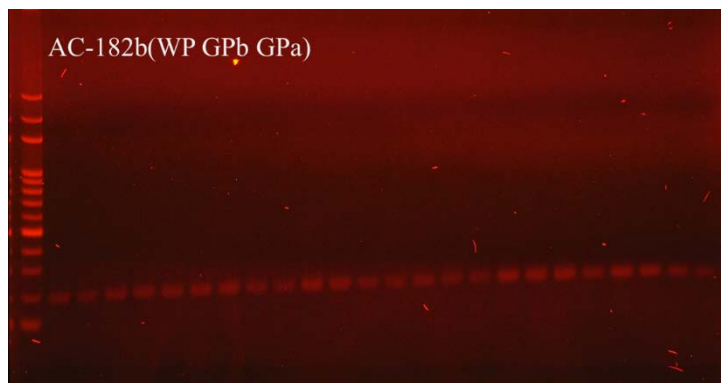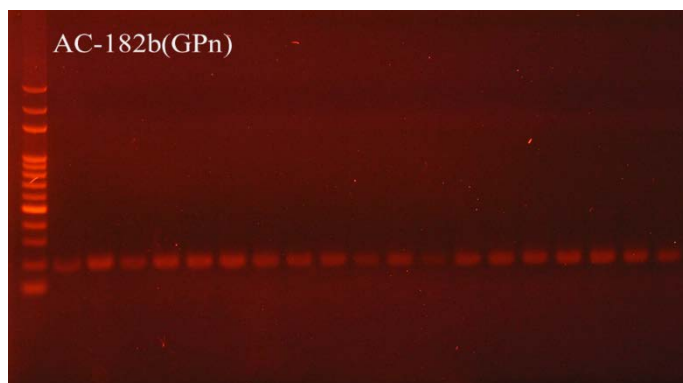

## AC-186

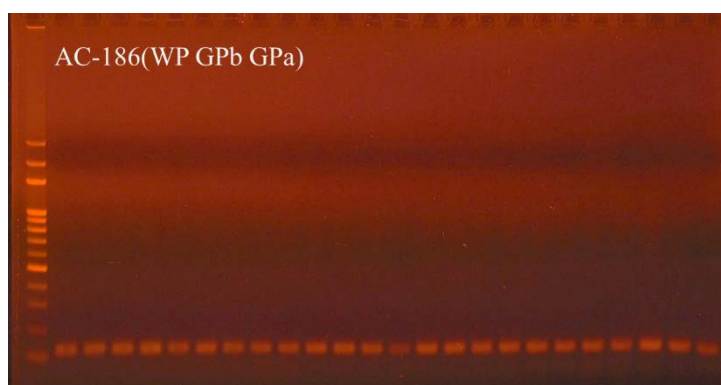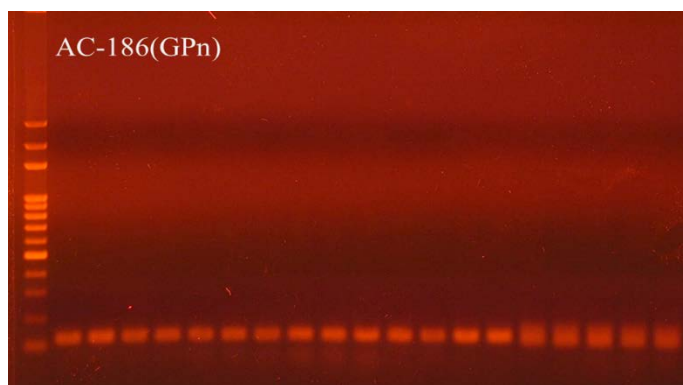

## AG-135

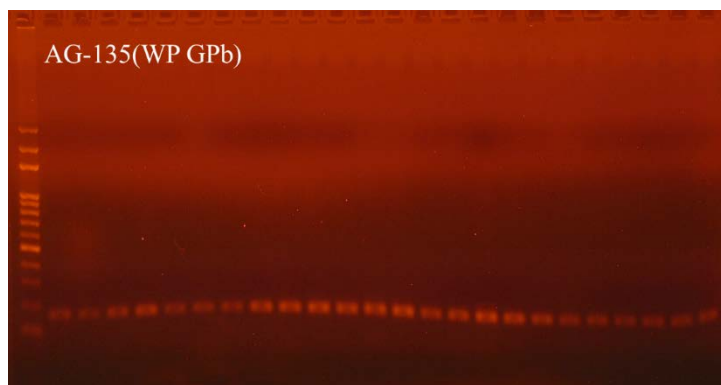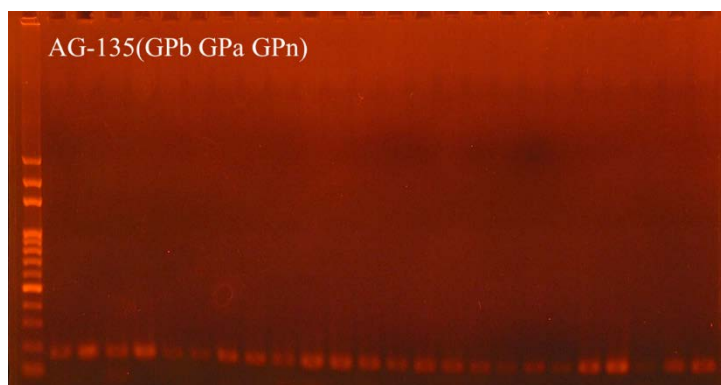



AG-223

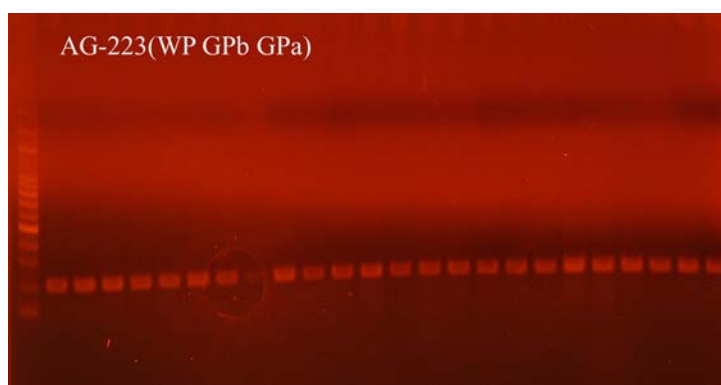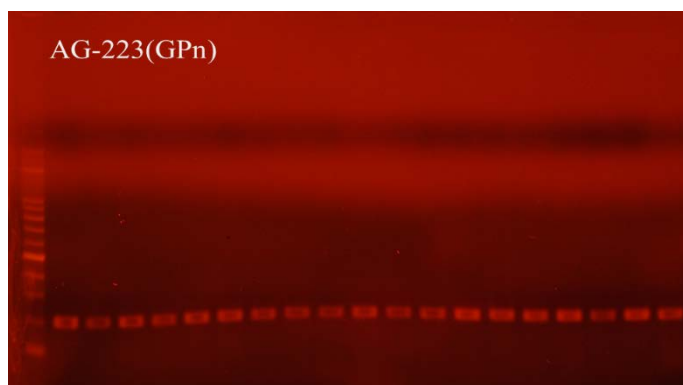

AG-224

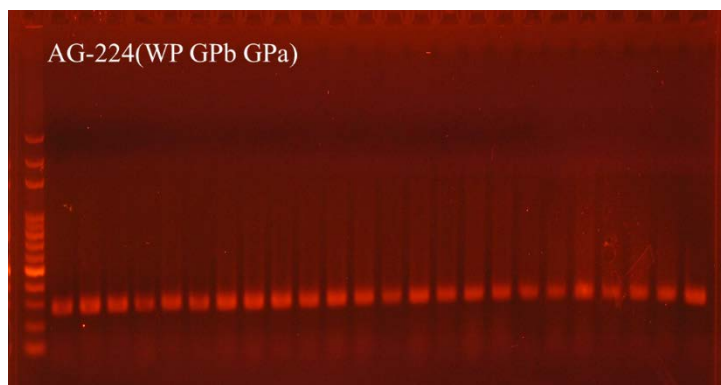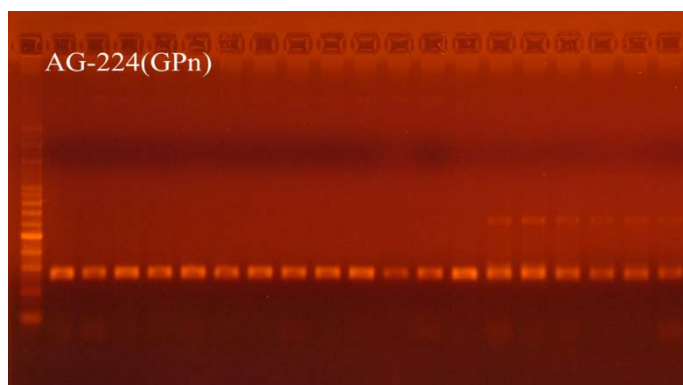

Supplement: s1 [file s1]
